# Supplementary material for: Virulence Factors of Streptococcus pneumoniae. Comparison between African and French Invasive Isolates and Implication for Future Vaccines
Source: PubMed Central journal article supplement (PMC4516325; doi:10.1371/journal.pone.0133885), 2015-07-27

**Supplemental appendix 2:** Position of virulence factors genes and VNTRs on the chromosome of reference strains R6 and Tigr4

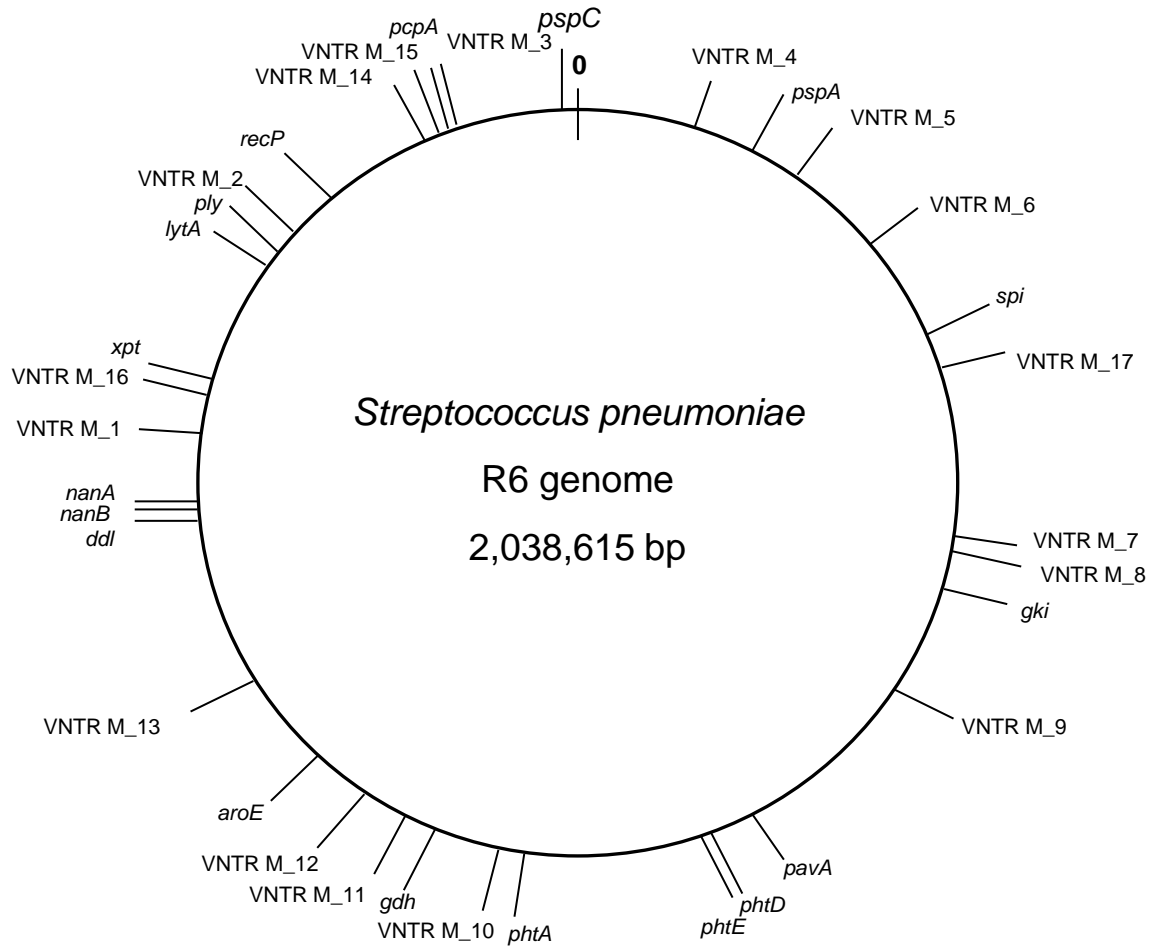

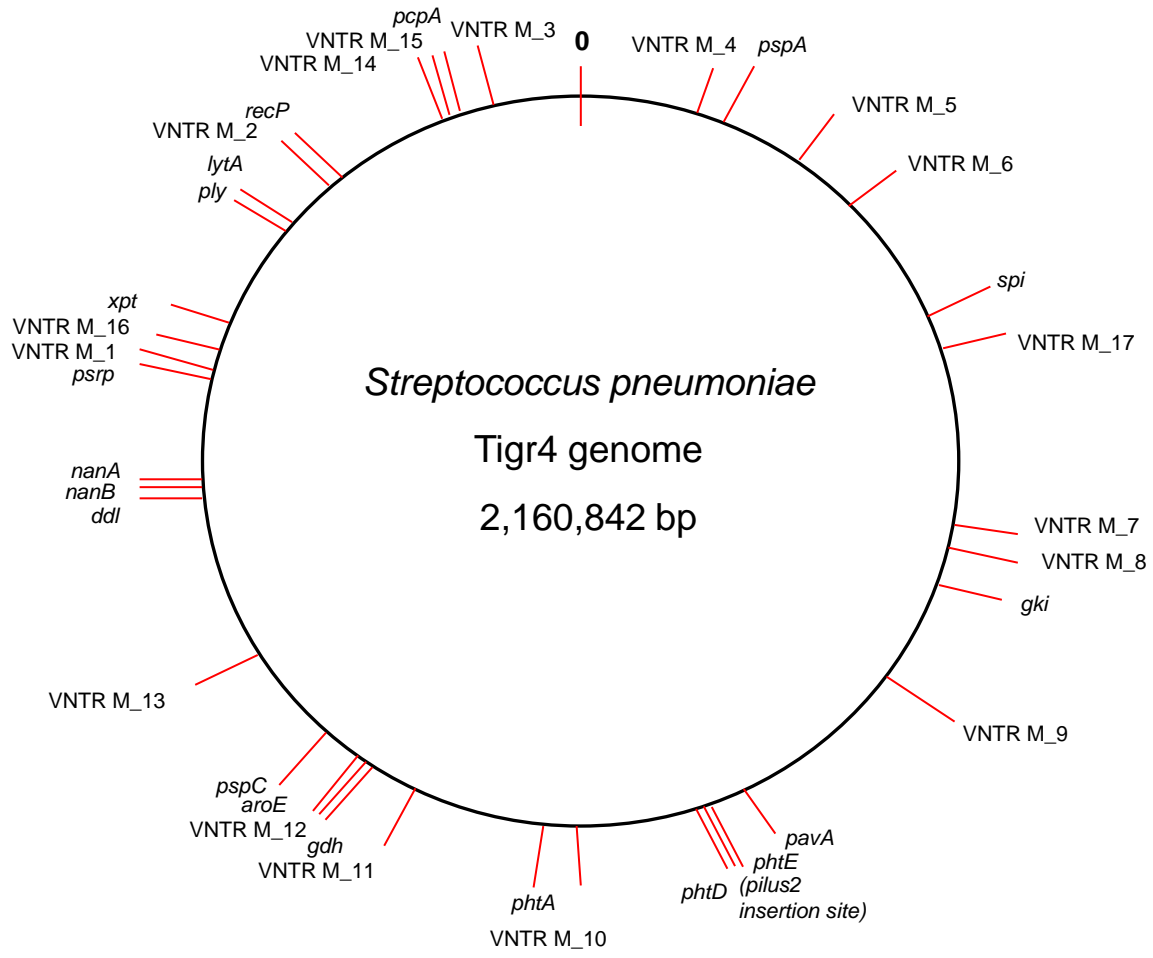

Supplement: pone.0133885.s001.pdf [file pone.0133885.s001.pdf]
