# Supplementary material for: Virulence Factors of Streptococcus pneumoniae. Comparison between African and French Invasive Isolates and Implication for Future Vaccines
Source: PubMed Central journal article supplement (PMC4516325; doi:10.1371/journal.pone.0133885), 2015-07-27
Supplement: pone.0133885.s002.pdf [file pone.0133885.s002.pdf]

**Supplemental appendix 1: Details of PCR detection method for each virulence factor gene.**

Conventional PCR was carried out on Techne TC-512 thermocyclers (Fisher Bioblock Scientific), using a standard 25 µL mix containing 2.5 µL DNA solution + 5 µL Green GoTaq® reaction buffer (5X) + 200 µM (each) deoxynucleoside triphosphate + 0.4 µM (each) primers + 1 unit of GoTaq® G2 DNA polymerase (Promega). For reaction involving high PM products (PspC detection), expand high fidelity PCR system (Roche) was used as previously published (Ianello F et al. Gene 2002). Real-time PCR was performed on Stratagene Mx3005P instrument (Agilent Technologies) using a 25µL mix containing 5µL DNA suspension + 5µL reaction mix (5X) LC FastStart DNA MaterPlus Hybprobe (Roche) + 0.9 µM (each) primers + 0.25 µM probes. For each gene, primers and probes sequences as well as PCR amplification conditions are detailed in the table below.

| Virulence factors genes | Name             | Primers and Probes                |                                     | Conditions of amplifications                     |                                                        |                 | Positive control (reference strain)                          | References                                                    |
|-------------------------|------------------|-----------------------------------|-------------------------------------|--------------------------------------------------|--------------------------------------------------------|-----------------|--------------------------------------------------------------|---------------------------------------------------------------|
|                         |                  | Name                              | Sequences (5'→3')                   | initial denaturation                             | N cycles [(denaturation), (hybridation), (elongation)] | final extension |                                                              |                                                               |
| <i>Conventional PCR</i> |                  |                                   |                                     |                                                  |                                                        |                 |                                                              |                                                               |
| <i>pspA</i>             | all types        | primer-F (LSM12)                  | CCGGATCCAGCGTCGCTATCTTAGGGGCTGGTT   | 95 °C (3 min)                                    | 30 [95 °C (1 min), 62 °C (1 min), 72 °C (3 min)]       | 72 °C (10 min)  | R6 / Tigr4                                                   | Hollingshead S <i>et al.</i> J Med Microbiol 2006; 55:215-21  |
|                         |                  | primer-R (SKH02)                  | CCACATACCGTTTTCTTGTCCAGCC           |                                                  |                                                        |                 |                                                              |                                                               |
|                         | Family 1         | primer-F (LSM12)                  | CCGGATCCAGCGTCGCTATCTTAGGGGCTGGTT   | 95 °C (3 min)                                    | 30 [95 °C (1 min), 62 °C (1 min), 72 °C (3 min)]       | 72 °C (10 min)  | R6                                                           | Hollingshead S <i>et al.</i> J Med Microbiol 2006; 55:215-21  |
|                         |                  | primer-R (SKH63)                  | TTTCTGGCTCATYAACTGCTTTC             |                                                  |                                                        |                 |                                                              |                                                               |
| Family 2                | primer-F (LSM12) | CCGGATCCAGCGTCGCTATCTTAGGGGCTGGTT | 95 °C (3 min)                       | 30 [95 °C (1 min), 62 °C (1 min), 72 °C (3 min)] | 72 °C (10 min)                                         | Tigr4           | Hollingshead S <i>et al.</i> J Med Microbiol 2006; 55:215-21 |                                                               |
|                         | primer-R (SKH52) | TGGGGGTGGAGTTTCTTCTCATCT          |                                     |                                                  |                                                        |                 |                                                              |                                                               |
| Family 3                | primer-F (SKH41) | CGCACAGACTAACAGATGAAC             | 95 °C (3 min)                       | 30 [95 °C (1 min), 62 °C (1 min), 72 °C (3 min)] | 72 °C (10 min)                                         | NA              | Hollingshead S <i>et al.</i> J Med Microbiol 2006; 55:215-21 |                                                               |
|                         | primer-R (SKH42) | CTTGTCATCAACTTCATCC               |                                     |                                                  |                                                        |                 |                                                              |                                                               |
| <i>pspC</i>             | all types        | primer-F (IF30)                   | AAGATGAAGATCGCTACGAACAC             | 94 °C (4 min)                                    | 30 [92 °C (30 sec), 50 °C (30 sec), 68 °C (10 min)]    | 68 °C (20 min)  | R6 / Tigr4                                                   | Ianello F <i>et al.</i> Gene 2002; 284:63-71                  |
|                         |                  | primer-R (IF43)                   | AATGAGAAACGAATCCTTAGCAAT            |                                                  |                                                        |                 |                                                              |                                                               |
|                         | Group 4          | primer-F (LU9)                    | GAAGAGTTAGAAGAGGGAATAACCTCACGGT     | 96 °C (5 min)                                    | 30 [96 °C (45 sec), 50 °C (45 sec), 72 °C (3 min)]     | 72 °C (10 min)  | NA                                                           | Dieudonne-Vatran A <i>et al.</i> J Immunol 2009; 182: 7865–77 |
|                         |                  | primer-R (LU10)                   | GTTTACCCATTTACCATTGGCATTGACTCTA     |                                                  |                                                        |                 |                                                              |                                                               |
| <i>ply</i>              |                  | primer-F (JVS59L)                 | TGAGACTAAGTTACAGCTTACAG             | 95 °C (5 min)                                    | 35 [95 °C (20 sec), 55 °C (30 sec), 68 °C (1 min)]     | 68 °C (10 min)  | R6 / Tigr4                                                   | Sakai F <i>et al.</i> Plos One 2013; 8:e67147                 |
|                         |                  | primer-R (JVS60R)                 | CTAATTTTACAGAGAGATTACGA             |                                                  |                                                        |                 |                                                              |                                                               |
|                         |                  | primer-Fbis <sup>8</sup> (new)    | ATGGAAATCGCTAGGCAAGA                | 95 °C (5 min)                                    | 30 [95 °C (45 sec), 55 °C (45 sec), 72 °C (90 sec)]    | 728 °C (5 min)  | R6 / Tigr4                                                   | Home made                                                     |
|                         |                  | primer-Rbis <sup>8</sup> (new)    | TTAGTCCAACCCAGCGCTGAT               |                                                  |                                                        |                 |                                                              |                                                               |
| <i>pavA</i>             |                  | primer-F (JVS65L)                 | CGATAAAAGCAGTCATAAAATCCT            | 95 °C (5 min)                                    | 35 [95 °C (20 sec), 55 °C (30 sec), 68 °C (1 min)]     | 68 °C (10 min)  | R6 / Tigr4                                                   | Sakai F <i>et al.</i> Plos One 2013; 8:e67147                 |
|                         |                  | primer-R (JVS66R)                 | AGGATTGAGAGATTCTGTACTTGG            |                                                  |                                                        |                 |                                                              |                                                               |
| <i>lytA</i>             |                  | primer-F (JVS1L)                  | AGTTAAGCATGATATTGAGAAC              | 95 °C (5 min)                                    | 35 [95 °C (20 sec), 55 °C (30 sec), 68 °C (1 min)]     | 68 °C (10 min)  | R6 / Tigr4                                                   | Sakai F <i>et al.</i> Plos One 2013; 8:e67147                 |
|                         |                  | primer-R (JVS2R)                  | TTCGTTGAAATAGTACCATTAT              |                                                  |                                                        |                 |                                                              |                                                               |
| <i>phtA</i>             |                  | primer-F                          | TTCTTACGAGTTGGGACTGTATCAAGC         | 96 °C (5 min)                                    | 30 [96 °C (45 sec), 54 °C (45 sec), 72 °C (3 min)]     | 72 °C (10 min)  | R6 / Tigr4                                                   | Adamou J.E. <i>et al.</i> Infect Immun 2001; 69: 949-58       |
|                         |                  | primer-R                          | GTTTATTTTTCTTACTTACAGATGAAGG        |                                                  |                                                        |                 |                                                              |                                                               |
| <i>phtB</i>             |                  | primer-F                          | TGCCCTAAGTGTTCCTATGAGCT             | 96 °C (5 min)                                    | 30 [96 °C (45 sec), 54 °C (45 sec), 72 °C (3 min)]     | 72 °C (10 min)  | Tigr4                                                        | Adamou J.E. <i>et al.</i> Infect Immun 2001; 69: 949-58       |
|                         |                  | primer-R                          | TTACTTACTCTCCTTAATAAAGCCAATAG       |                                                  |                                                        |                 |                                                              |                                                               |
| <i>phtD</i>             |                  | primer-F                          | TCCTATGAACCTGGTCGTC                 | 96 °C (5 min)                                    | 30 [96 °C (45 sec), 54 °C (45 sec), 72 °C (3 min)]     | 72 °C (10 min)  | R6 / Tigr4                                                   | Adamou J.E. <i>et al.</i> Infect Immun 2001; 69: 949-58       |
|                         |                  | primer-R                          | TTACTATATAGGAGCCGGTTGACT            |                                                  |                                                        |                 |                                                              |                                                               |
|                         |                  | primer-Rbis* (PhtD-R new)         | TTTCGTTCCGAGAAGAAGACT               |                                                  |                                                        |                 |                                                              | Home made                                                     |
| <i>phtE</i>             |                  | primer-F                          | GCCTATGCACTAAACCAGCA                | 96 °C (5 min)                                    | 30 [96 °C (45 sec), 54 °C (45 sec), 72 °C (3 min)]     | 72 °C (10 min)  | R6 / Tigr4                                                   | Adamou J.E. <i>et al.</i> Infect Immun 2001; 69: 949-58       |
|                         |                  | primer-R                          | CTAAATGTTTTGCGCAGCT                 |                                                  |                                                        |                 |                                                              |                                                               |
| Pilus islet-2           | presence         | primer-F (sipA-up )               | CGTGGGTATCAGGTGTCCTATGATAA          | 95 °C (15 min)                                   | 35 [95 °C (20 sec), 55 °C (30 sec), 68 °C (1 min)]     | 68 °C (10 min)  | NA                                                           | Aguir SI <i>et al.</i> Vaccine 2012; 30:5487-90               |
|                         | absence          | primer-R (sipA-dn)                | GCCTCGTCTTCTAATGACTGTTAC            |                                                  |                                                        |                 |                                                              |                                                               |
|                         |                  | primer-F (1008for)                | GCTGGATCGAGTTTAAACCAGAA             | 95 °C (15 min)                                   | 35 [95 °C (20 sec), 55 °C (30 sec), 68 °C (1 min)]     | 68 °C (10 min)  | R6 / Tigr4                                                   | Bagnoli F <i>et al.</i> J of Bacteriology 2008; 190:384-08    |
|                         |                  | primer-R (1009rev)                | TAAGGATCACCAAAGTCCAAGGCA            |                                                  |                                                        |                 |                                                              |                                                               |
| <i>nanA</i>             |                  | primer-F                          | ATAGACGTGCGCAAAATACAGAATCA          | 98 °C (5min)                                     | 35 [98 °C (30 sec), 55 °C (30 sec), 72 °C (1 min)]     | 72 °C (10 min)  | R6 / Tigr4                                                   | Pettigrew M <i>et al.</i> Infect Immun 2006; 74:3360-65       |
|                         |                  | primer-R                          | GTCGAACTCCAAGCCAATAACTCCT           |                                                  |                                                        |                 |                                                              |                                                               |
| <i>nanB</i>             |                  | primer-F                          | ACTACGAGGTGTTAATCGTGAAGG            | 98 °C (5min)                                     | 35 [98 °C (30 sec), 55 °C (30 sec), 72 °C (1 min)]     | 72 °C (10 min)  | R6 / Tigr4                                                   | Pettigrew M <i>et al.</i> Infect Immun 2006; 74:3360-65       |
|                         |                  | primer-R                          | CCAATACCCGCGCAGGCATAACATC           |                                                  |                                                        |                 |                                                              |                                                               |
| <i>nanC</i>             |                  | primer-F                          | TGGGGTAAGTACAACAAGAGG               | 98 °C (5min)                                     | 35 [98 °C (30 sec), 51 °C (30 sec), 72 °C (1 min)]     | 72 °C (10 min)  | Tigr4                                                        | Pettigrew M <i>et al.</i> Infect Immun 2006; 74:3360-65       |
|                         |                  | primer-R                          | CTAATGGTACTGGCGCAAAATCA             |                                                  |                                                        |                 |                                                              |                                                               |
| <i>pcpA</i>             |                  | primer-F (SP2136F)                | CCCCTCACCCTTAGCATT                  | 96 °C (5 min)                                    | 30 [96 °C (45 sec), 54 °C (45 sec), 72 °C (3 min)]     | 72 °C (10 min)  | R6 / Tigr4                                                   | Browall S <i>et al.</i> J Infect Dis 2014; 209:377-88         |
|                         |                  | primer-R (SP2136R)                | CCTAGTTCGGAAGTAATCAA                |                                                  |                                                        |                 |                                                              |                                                               |
| <i>Real-time PCR</i>    |                  |                                   |                                     |                                                  |                                                        |                 |                                                              |                                                               |
| Pilus-1                 | <i>rrgA</i>      | primer-F                          | TTGTGACAAATCTTCTCTTGGGA             | 95 °C (10min)                                    | 45 [95 °C (15 sec), 60 °C (60 sec)]                    |                 | Tigr4                                                        | Selva L <i>et al.</i> PLoS ONE 2012; 7: e41587                |
|                         |                  | primer-R                          | GTCACCAGCTGATGATCTACCA              |                                                  |                                                        |                 |                                                              |                                                               |
|                         |                  | probe                             | FAM-CAGTGGCTCCACCTCC (Quencher MGB) |                                                  |                                                        |                 |                                                              |                                                               |
| <i>psrp</i>             |                  | primer-F                          | CTTTACATTTACCCCTTACGCTGCTA          | 95 °C (10min)                                    | 45 [95 °C (15 sec), 60 °C (60 sec)]                    |                 | Tigr4                                                        | Selva L <i>et al.</i> PLoS ONE 2012; 7: e41587                |
|                         |                  | primer-R                          | CTGAGAGTGACTTAGACTGTGAAAGTG         |                                                  |                                                        |                 |                                                              |                                                               |
|                         |                  | probe                             | FAM-CTGGTCTGCTAGATTC (Quencher MGB) |                                                  |                                                        |                 |                                                              |                                                               |

**Table Legend:** <sup>8</sup>second pair of primers designed by alignment with *ply* gene sequence from the R6 reference strain \*new primer-R designed by alignment of *phtD* gene sequence from the three reference strains R6 (accession number NC\_003098.1), D39 (accession number NC\_008533.1), ATCC700669 (accession number NC\_011900.1) using ClustalW program. Abbreviations: F=forward, R=reverse, N=number, min=minutes, sec=seconds, NA=not available, ply=pneumolysin, pspA=pneumococcal surface protein A, pspC=pneumococcal surface protein C, pavA=pneumococcal adhesion and virulence A, lytA=autolysin A, pht=polyhistidine triad complex, nan=neuraminidase, pcpA=pneumococcal choline binding protein A, psrp=pneumococcal serine-rich protein.
